# Supplementary figures and images for: Effect of Pr/Zn on the anti-humidity and acetone-sensing properties of Co3O4 prepared by electrospray
Source: Royal Society of Chemistry journal article supplement (doi:10.1039/d2ra03321f), 2022-01-01

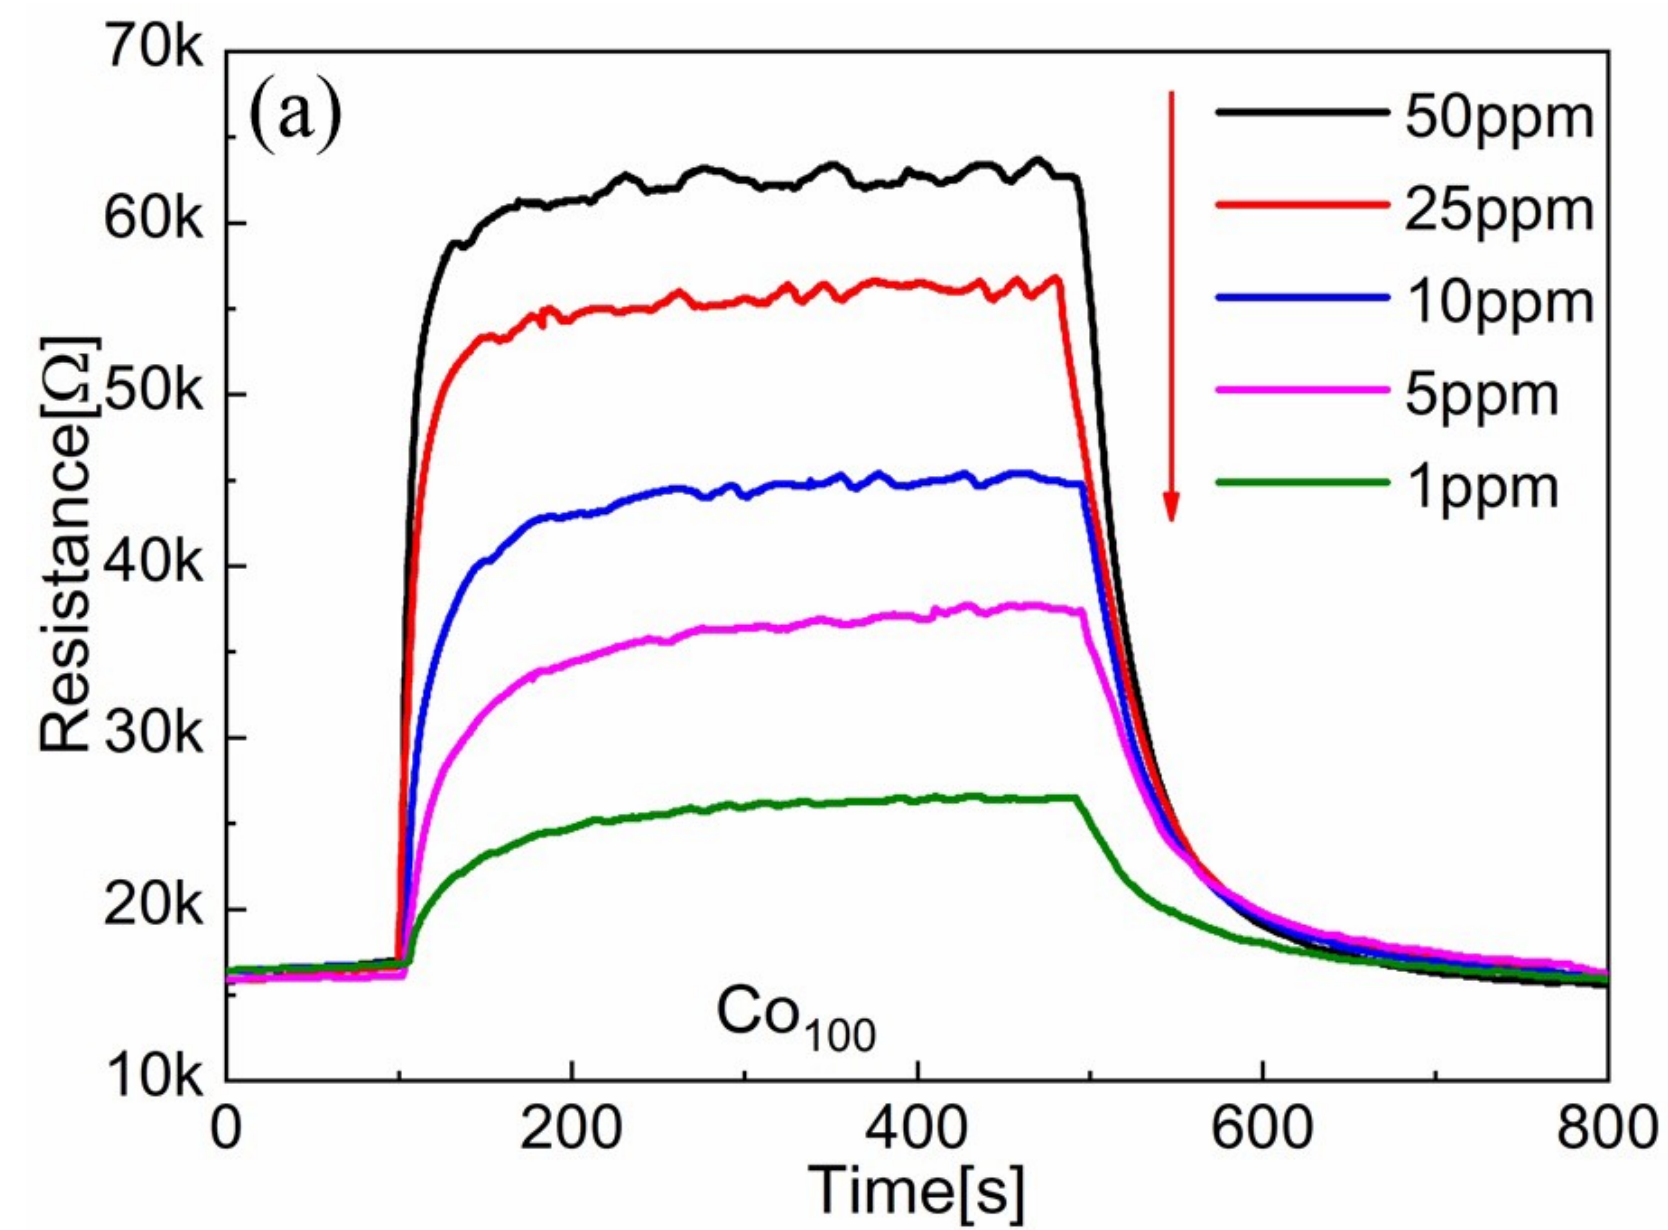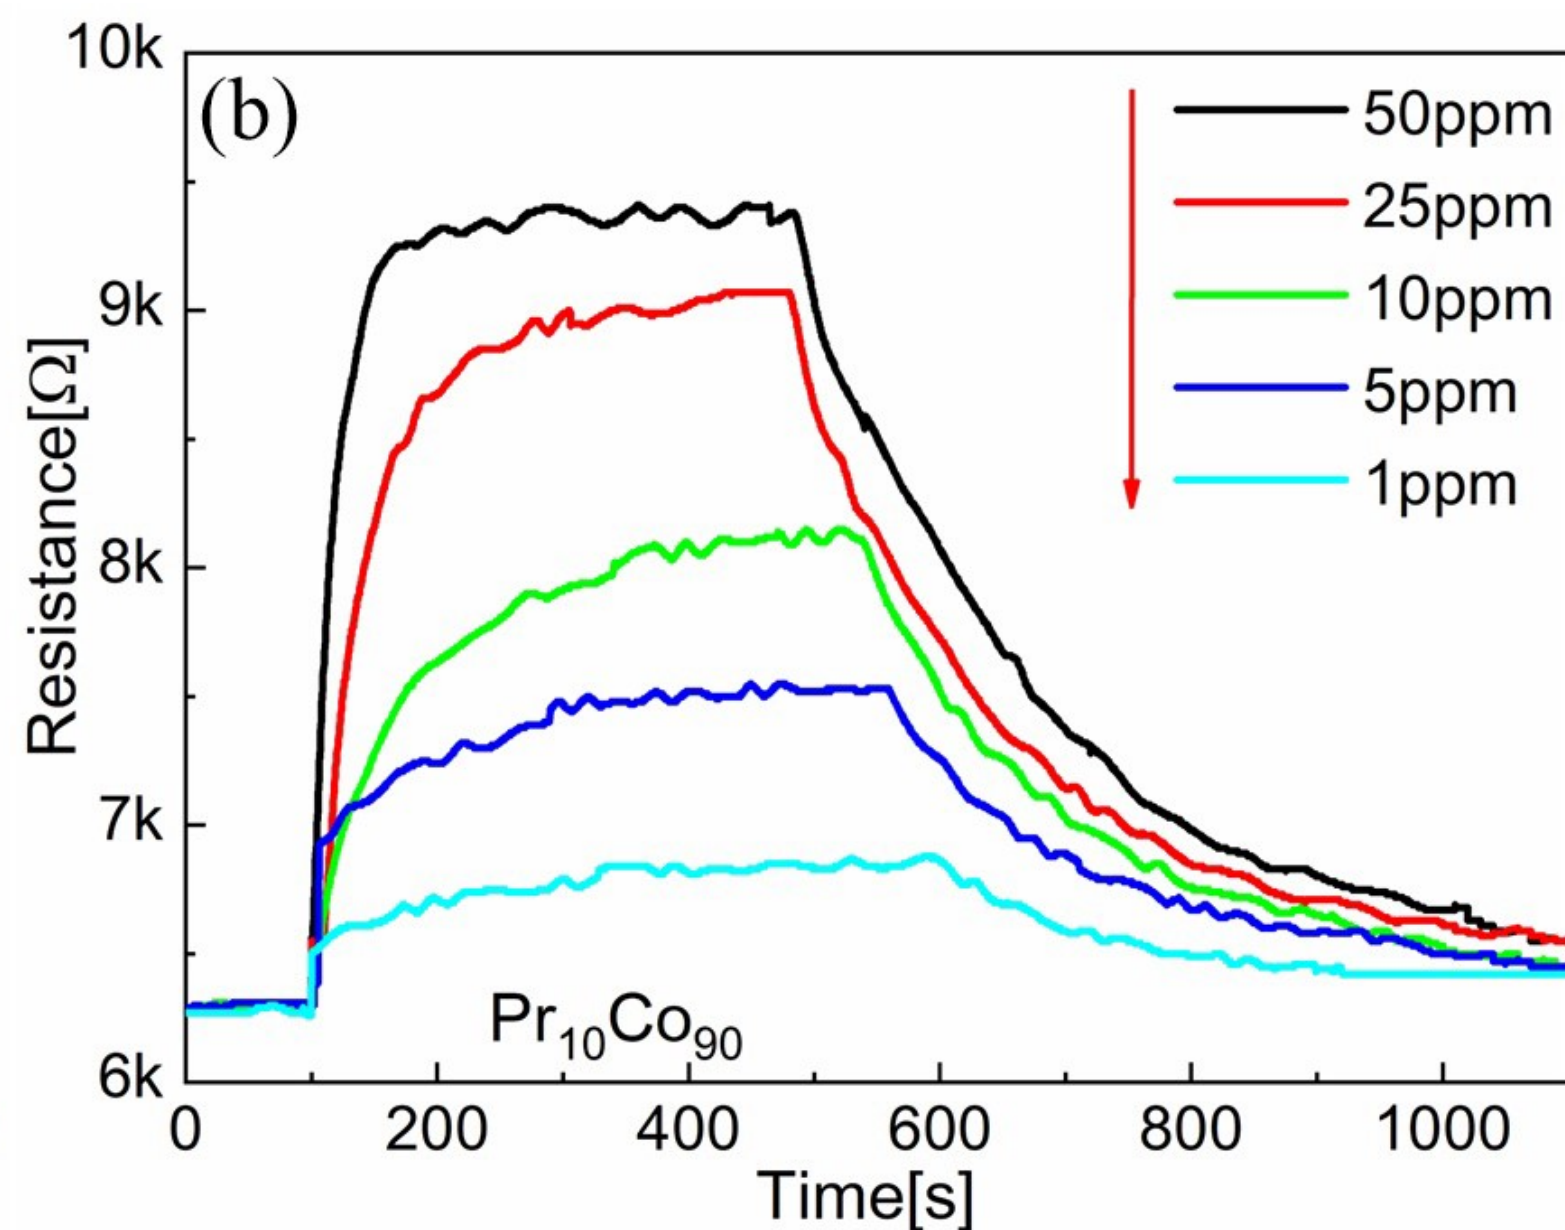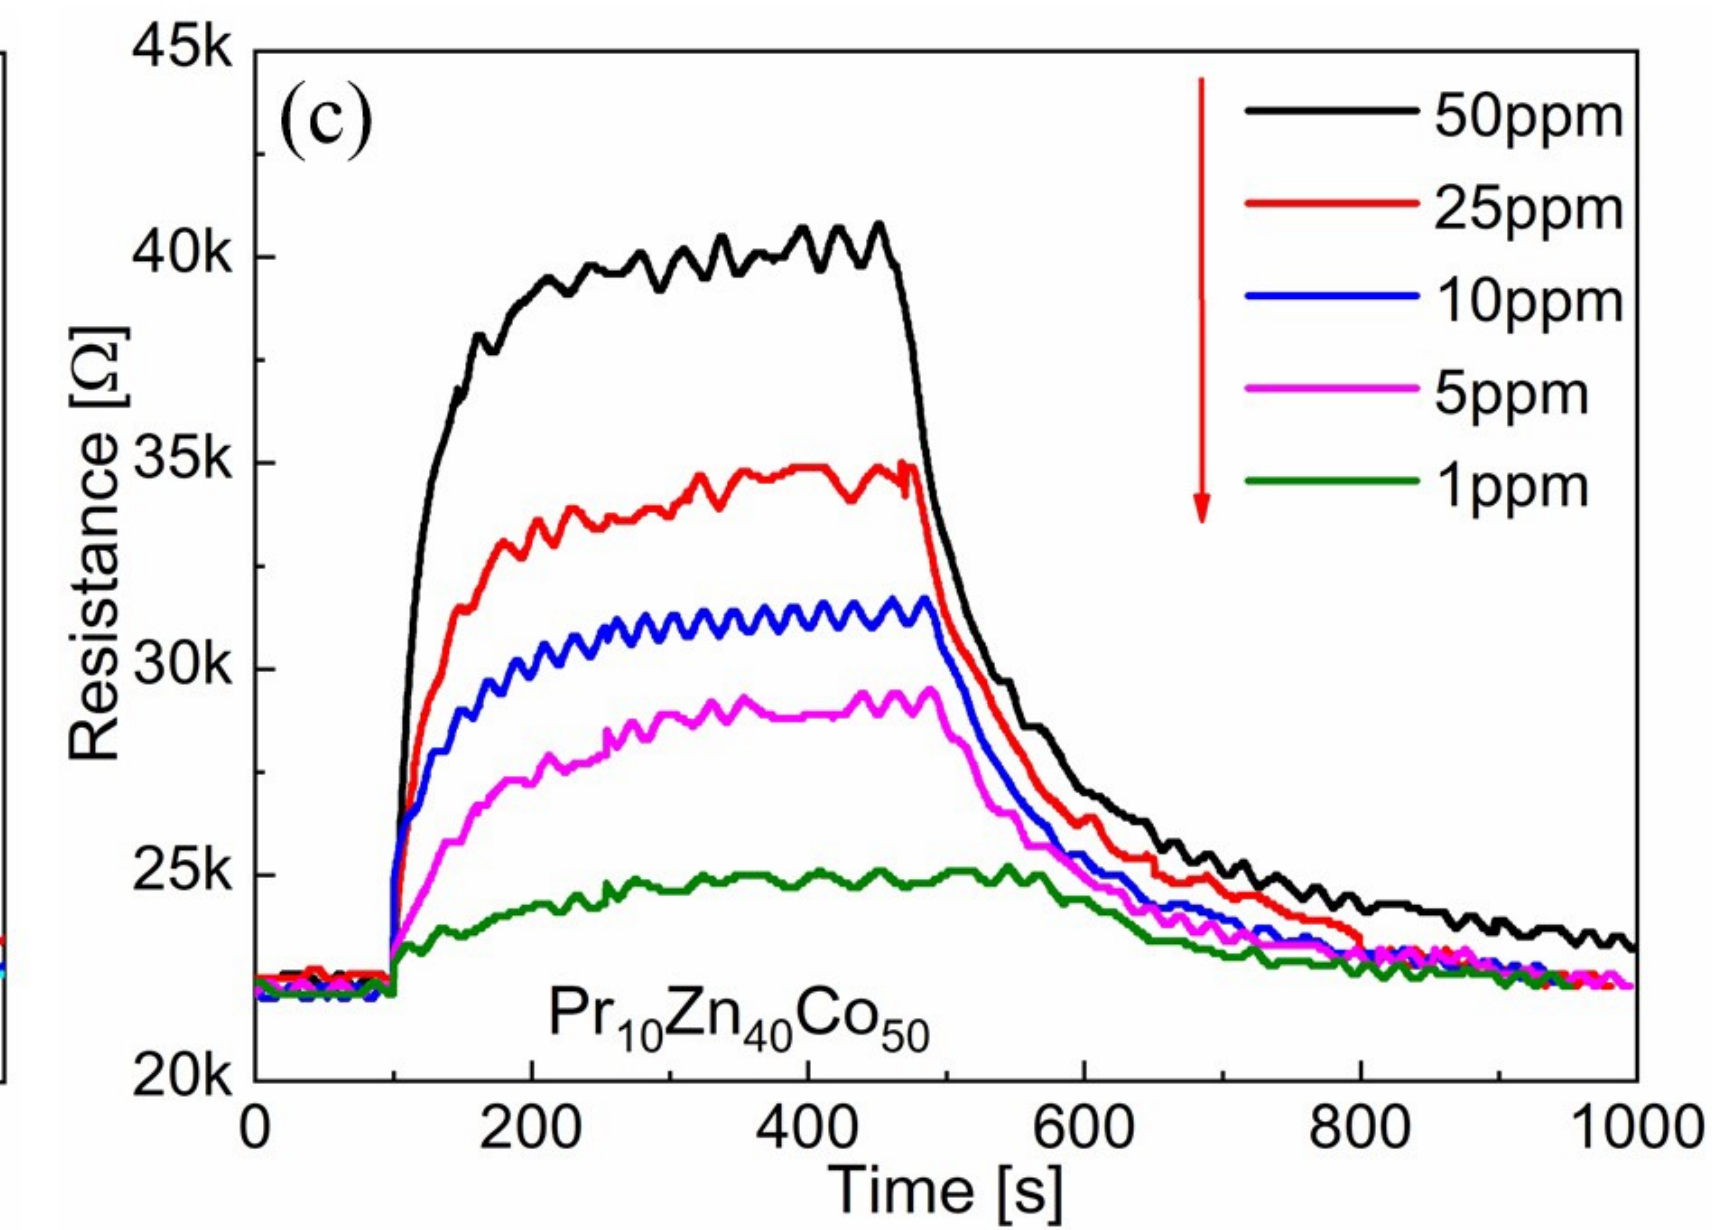

Supplement: d2ra03321f2.pdf [file d2ra03321f2.pdf]
